# Supplementary figures and images for: Transcriptomic comparison of corneal endothelial cells in young versus old corneas
Source: PubMed Central journal article supplement — Sci Rep. 2024 Dec 28;14:31110. doi: 10.1038/s41598-024-82423-6 (PMC11682284; doi:10.1038/s41598-024-82423-6), 2024-12-28

Figure S1. An heatmap with the full transcriptome.

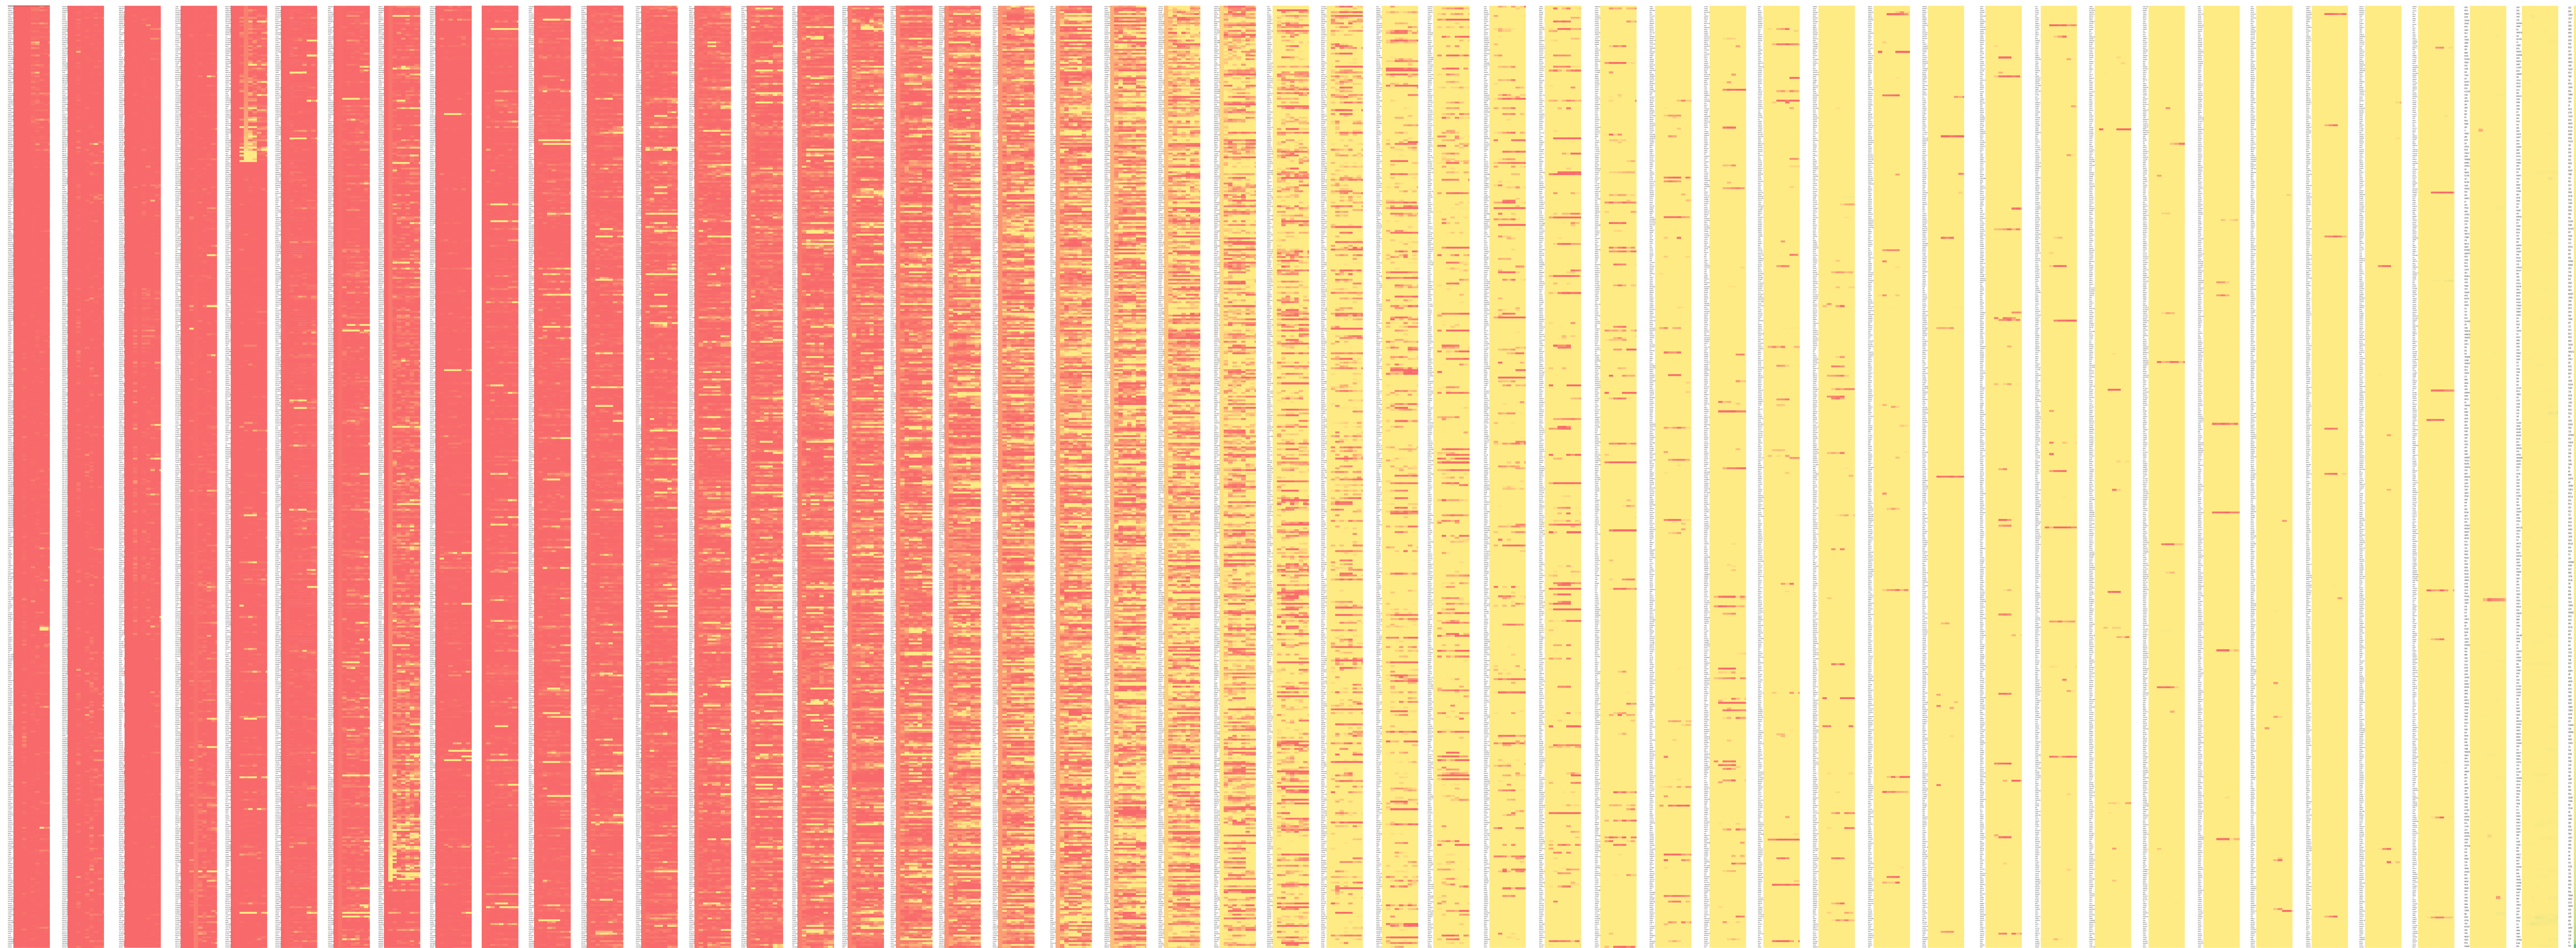

Supplement: 41598_2024_82423_MOESM1_ESM.pdf [file 41598_2024_82423_MOESM1_ESM.pdf]
